# Supplementary figures and images for: A Cross-Sectional Study of Glomerular Hyperfiltration in Polycystic Ovary Syndrome
Source: MDPI journal article supplement (doi:10.3390/ijms25094899), 2024-04-30

Supplementary figure S1

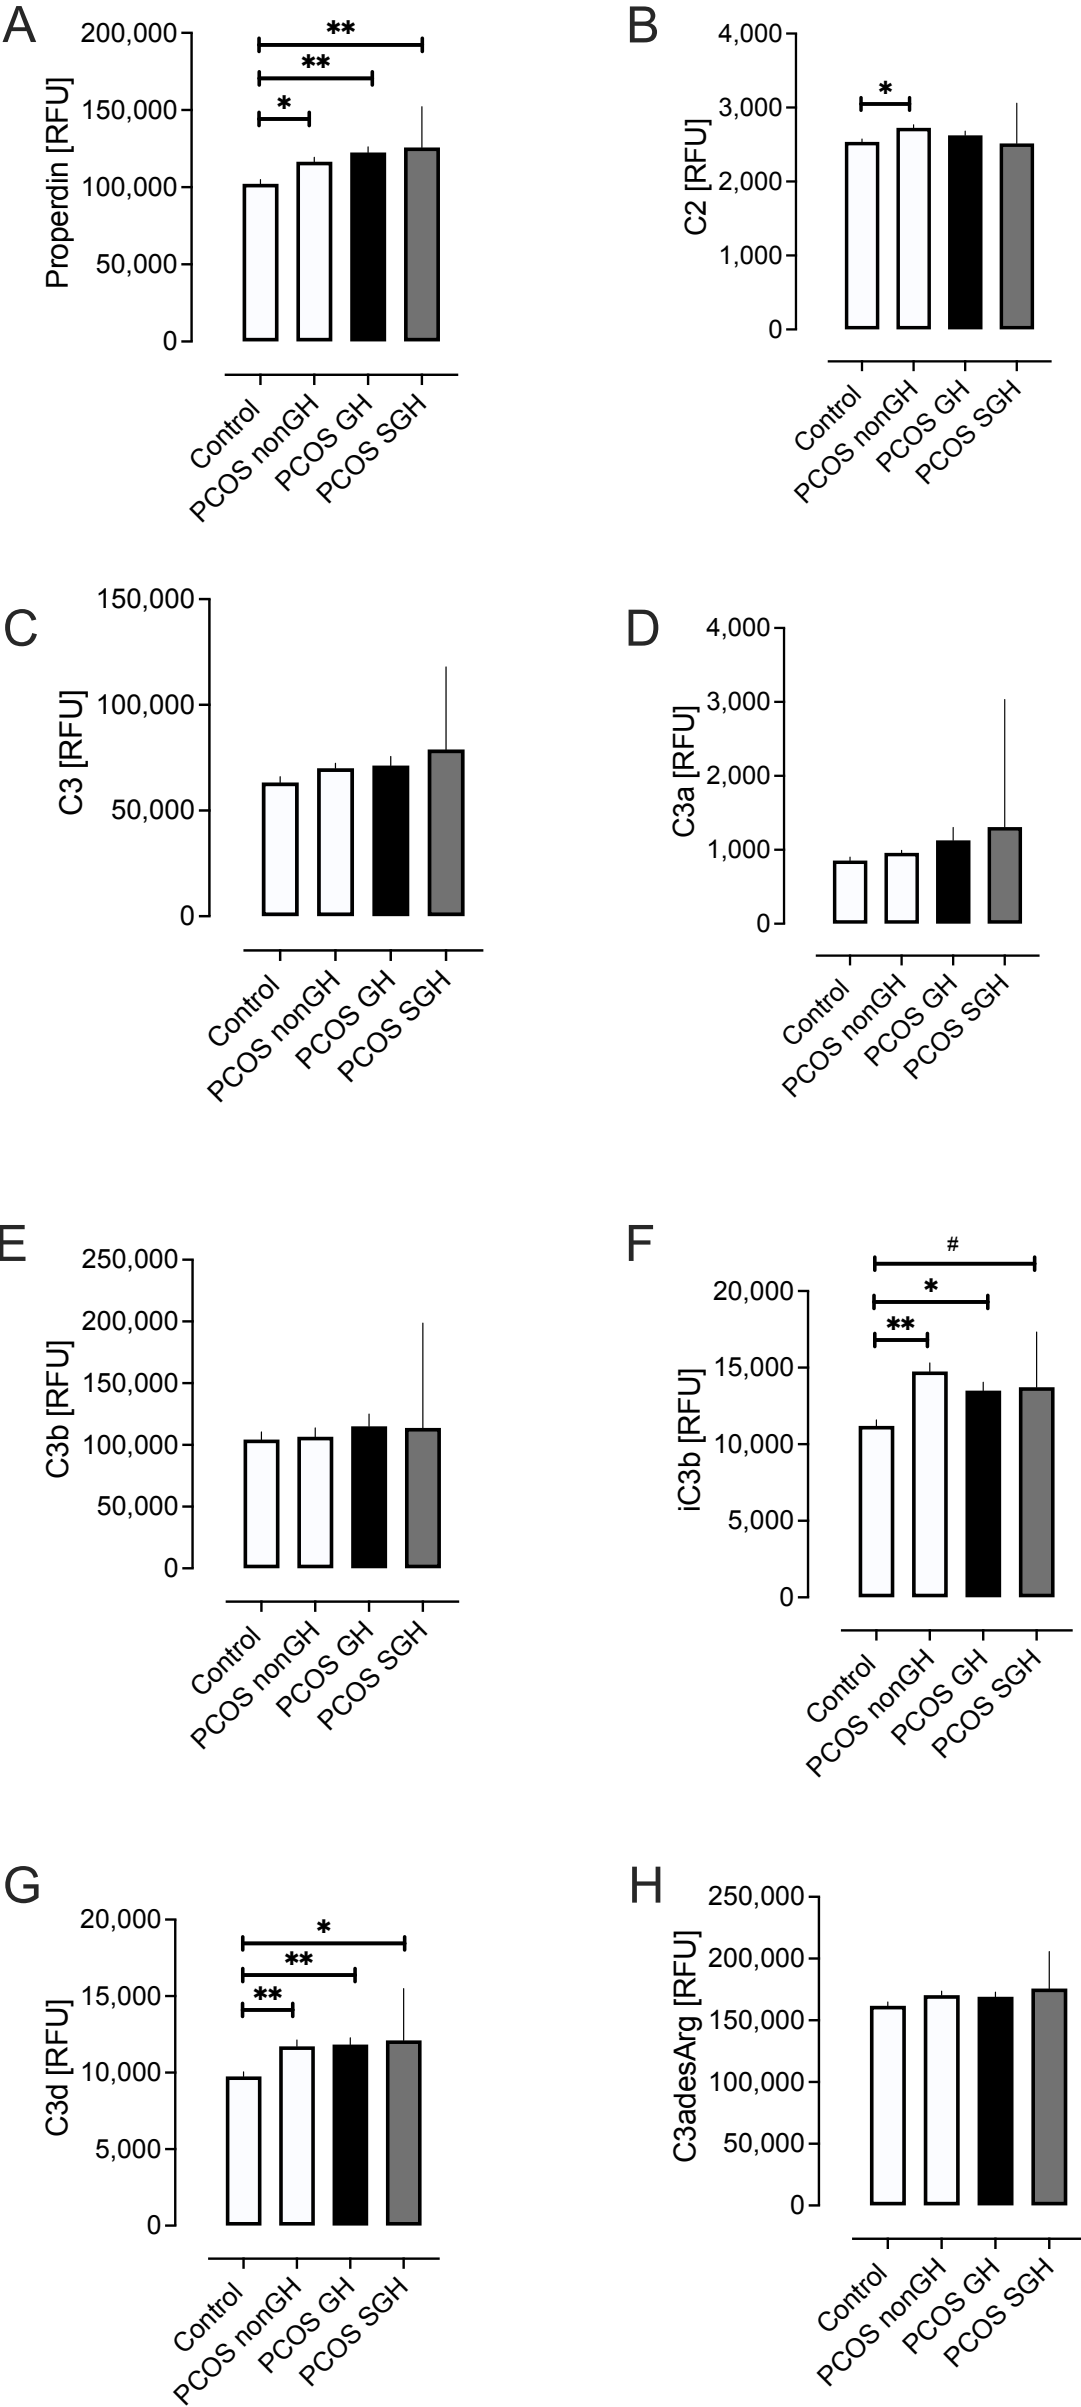

Supplementary figure S2

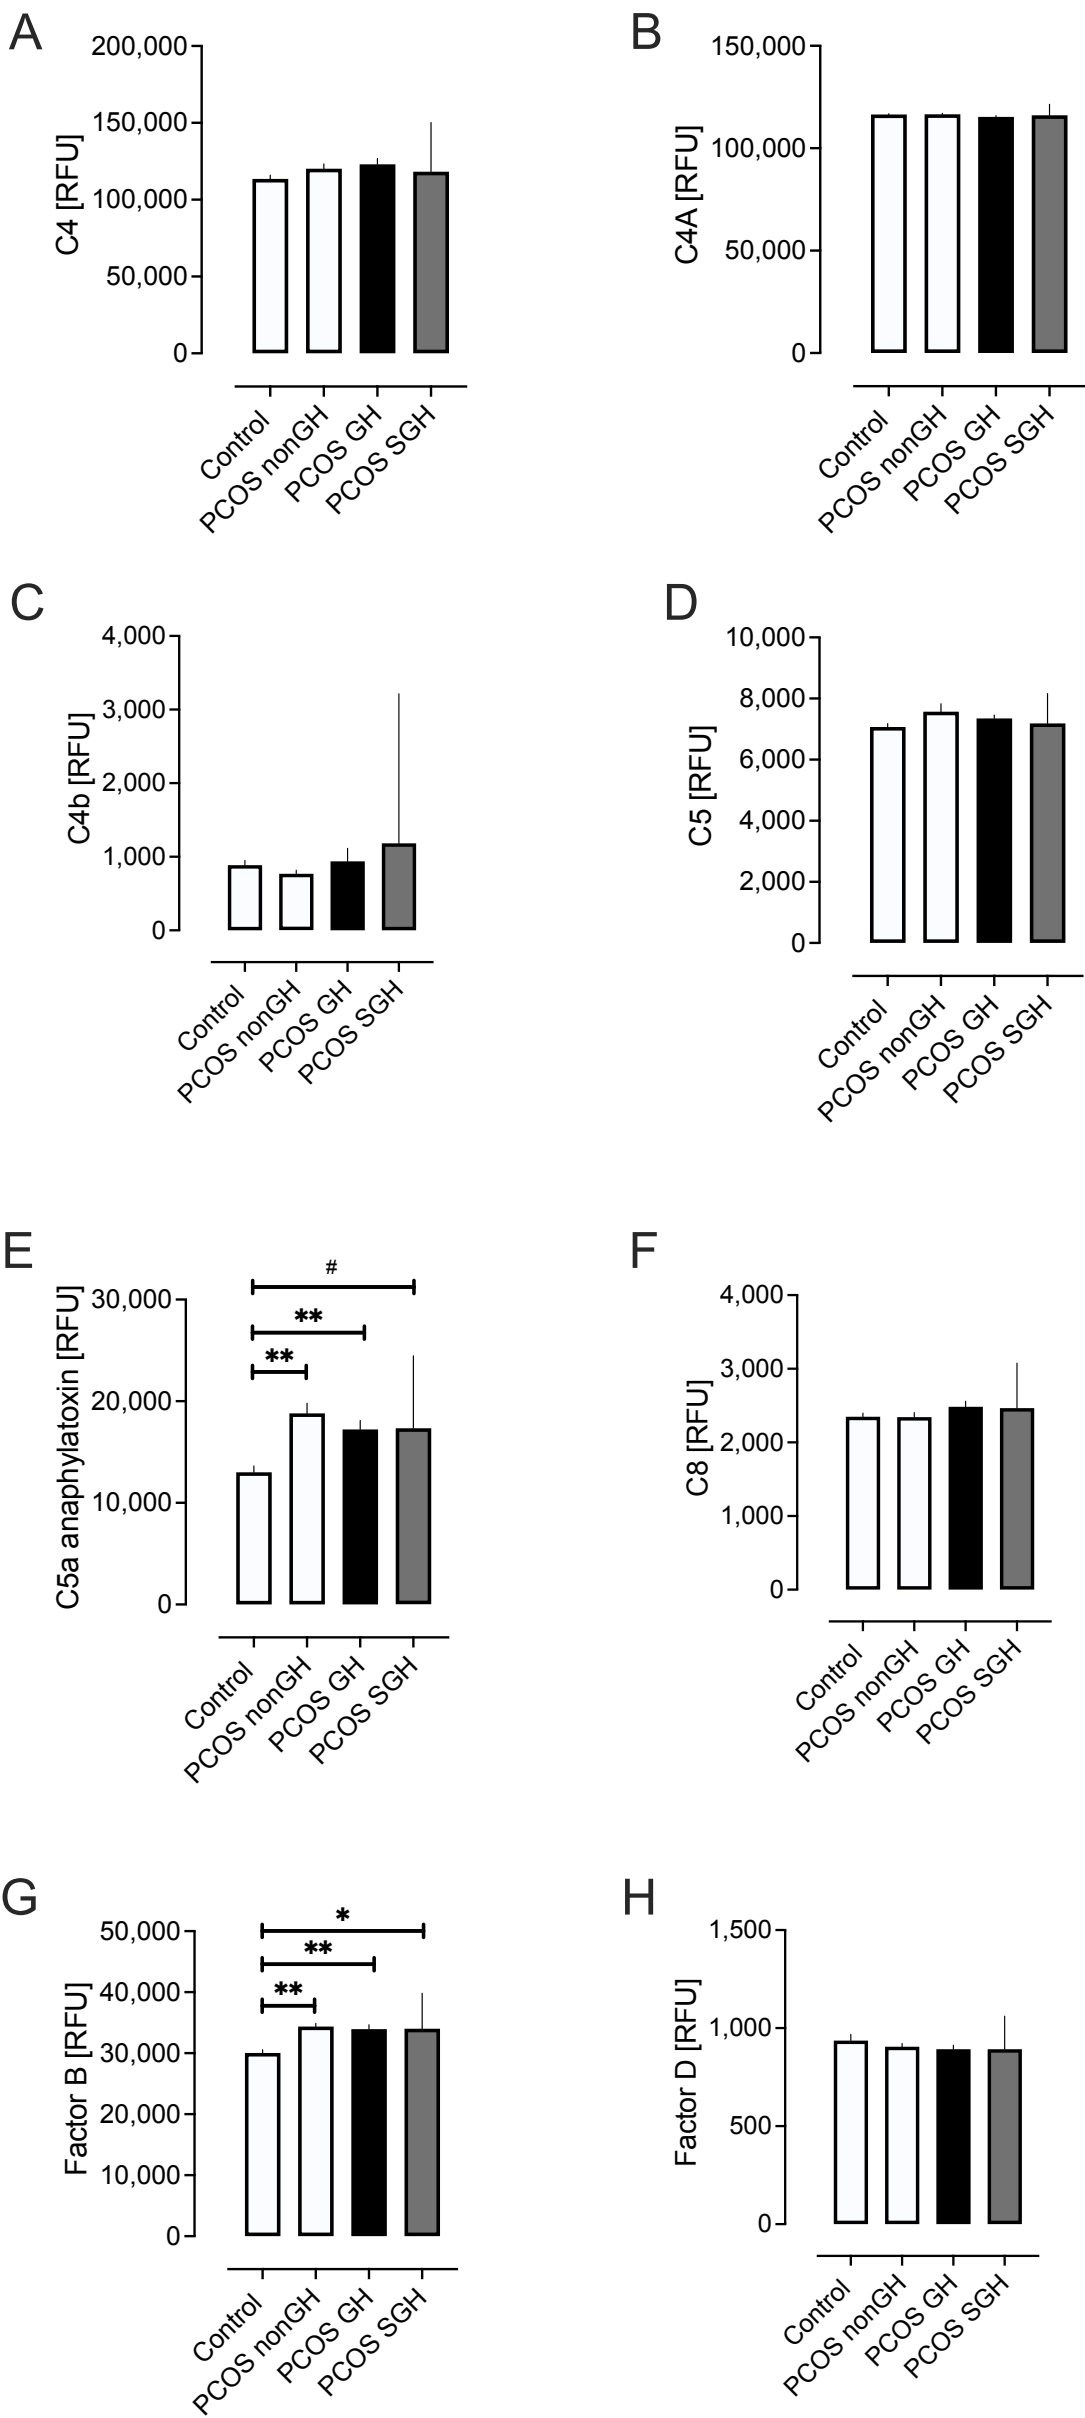

Supplementary figure S3

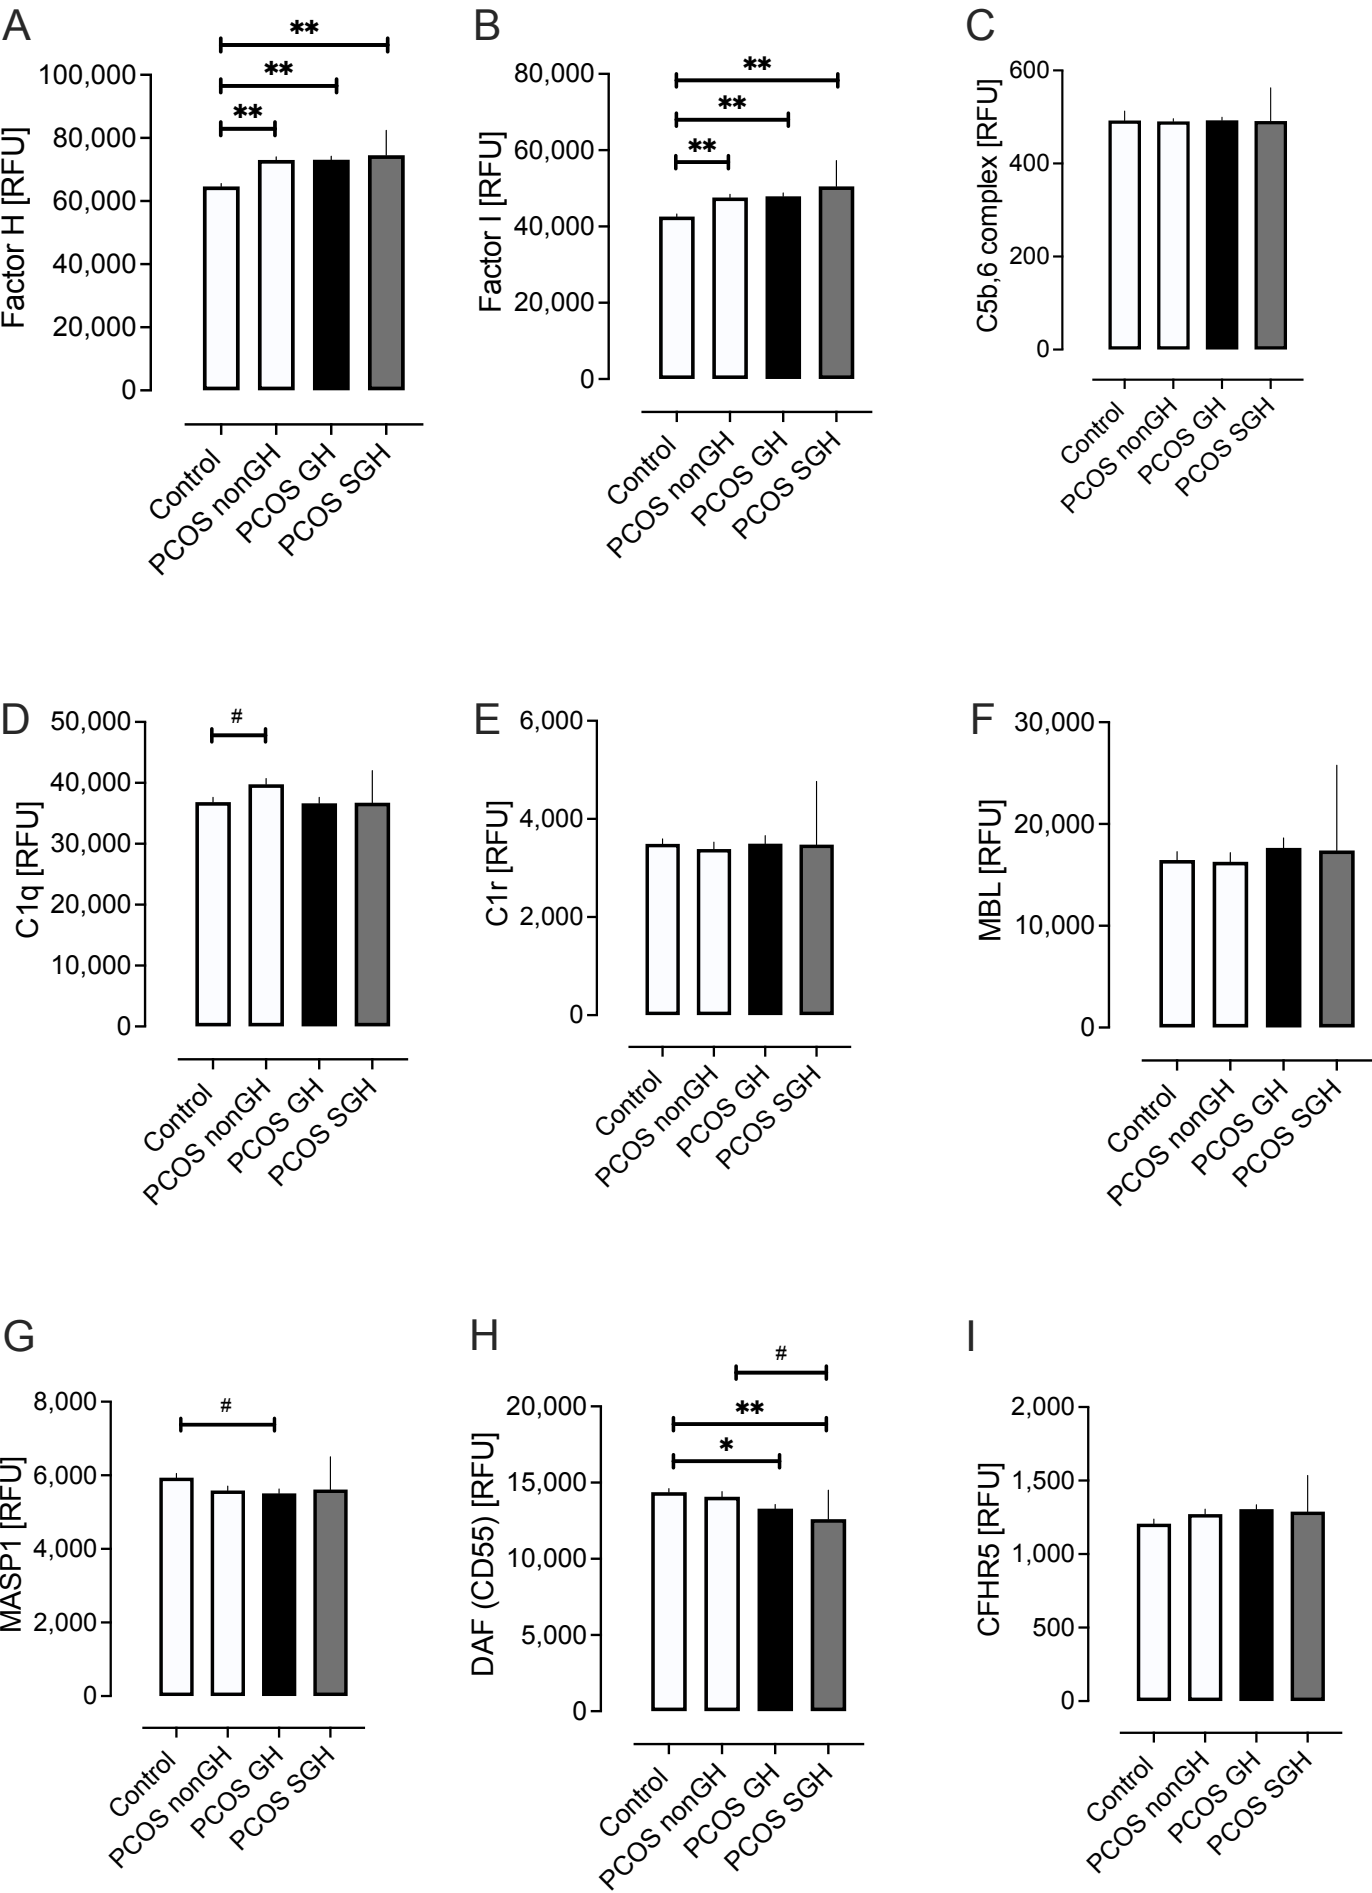

Supplement: s1 [file s1]
